# Supplementary material for: CD40×HER2 bispecific antibody overcomes the CCL2-induced trastuzumab resistance in HER2-positive gastric cancer
Source: PubMed Central journal article supplement (PMC9295658; doi:10.1136/jitc-2022-005063), 2022-07-15

Supplementary Figure 3

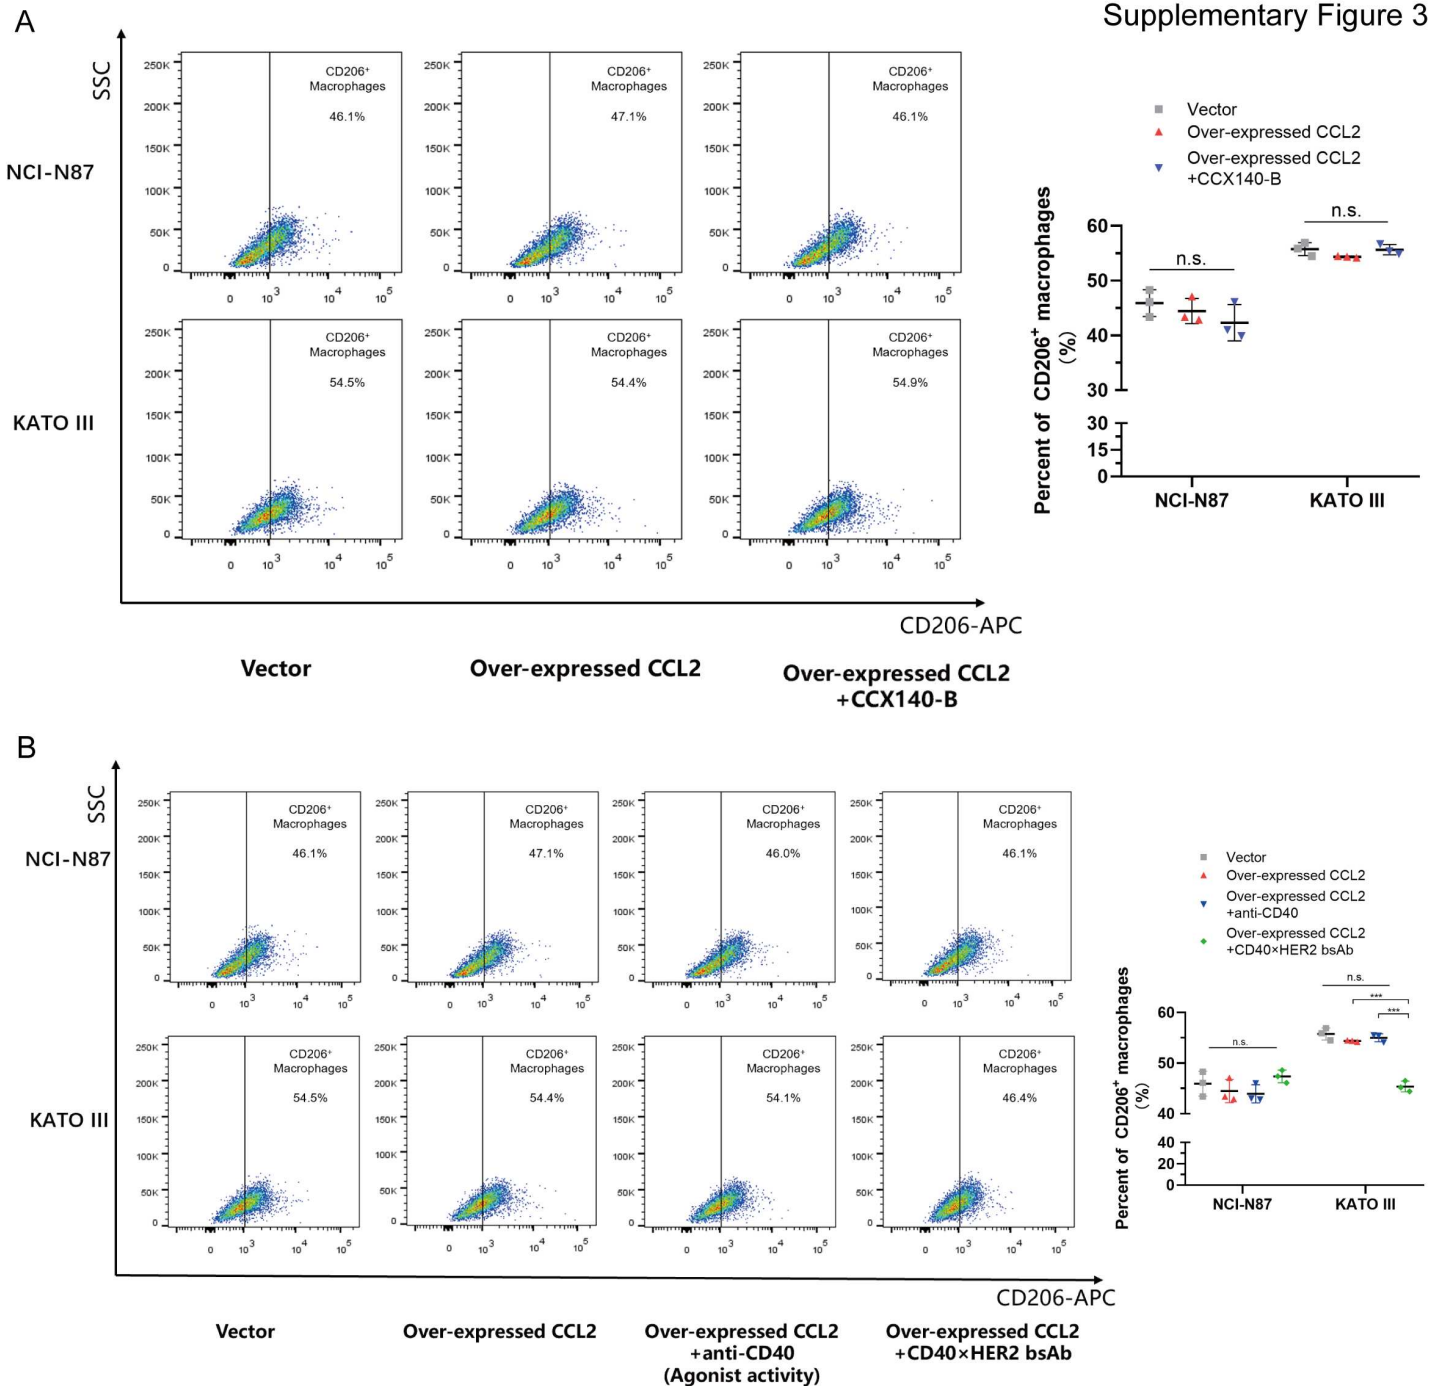

Supplement: jitc-2022-005063supp004.pdf [file jitc-2022-005063supp004.pdf]
