# Supplementary material for: CD40×HER2 bispecific antibody overcomes the CCL2-induced trastuzumab resistance in HER2-positive gastric cancer
Source: HighWire-hosted journal article supplement (doi:10.1136/jitc-2022-005063), 2022-07-01

Supplementary Figure 4

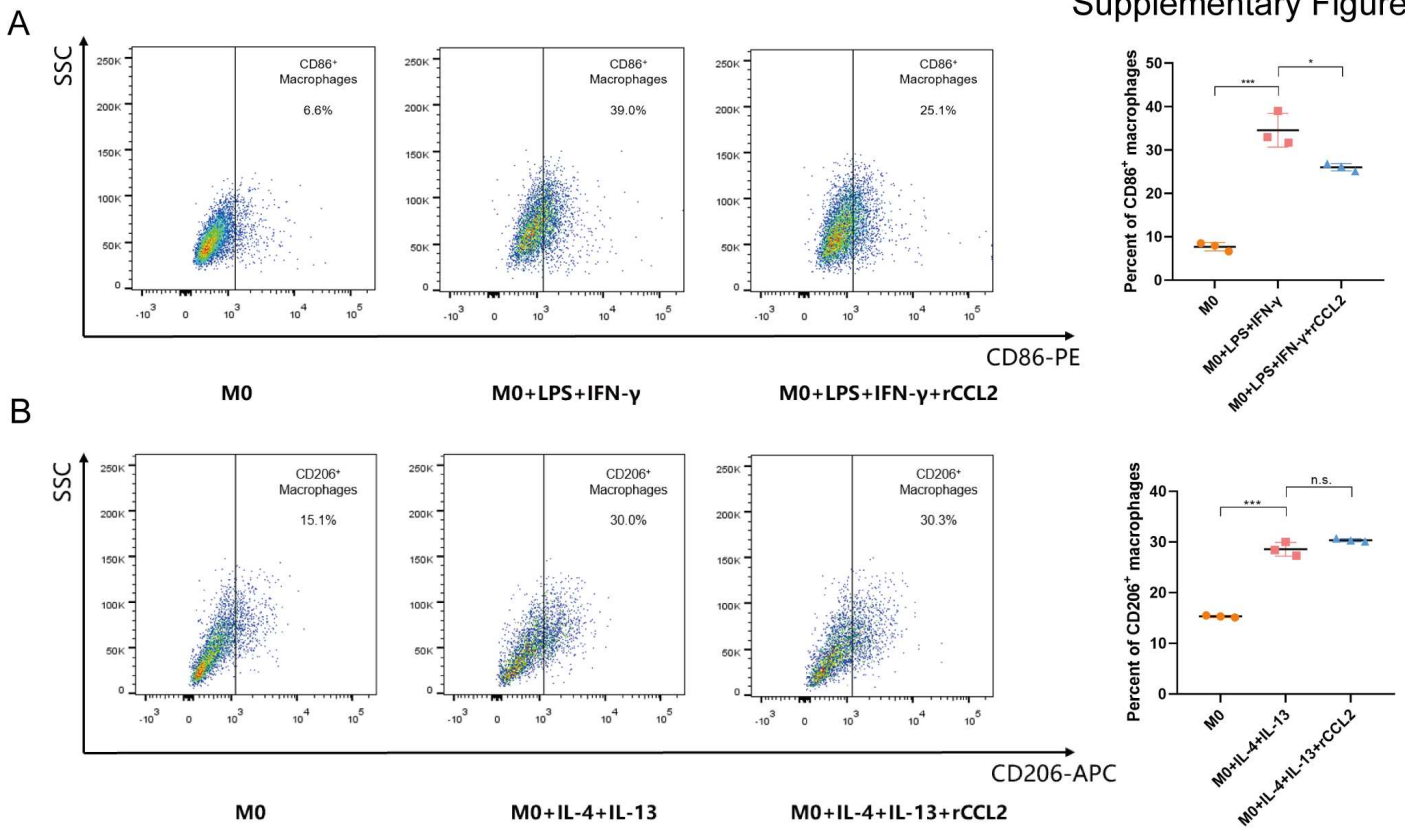

Supplement: jitc-2022-005063supp005_data_supplement.pdf [file jitc-2022-005063supp005_data_supplement.pdf]
