# Supplementary material for: CD40×HER2 bispecific antibody overcomes the CCL2-induced trastuzumab resistance in HER2-positive gastric cancer
Source: PubMed Central journal article supplement (PMC9295658; doi:10.1136/jitc-2022-005063), 2022-07-15
Supplement: jitc-2022-005063supp009.pdf [file jitc-2022-005063supp009.pdf]

**Supplementary Table 1.** Clinicopathologic features of patients with HER2-positive and HER2-negative GC

| Characteristics                               | HER2-negative<br>N=40 | HER2-positive<br>n=33 | P value            |
|-----------------------------------------------|-----------------------|-----------------------|--------------------|
| <b>Gender</b>                                 |                       |                       |                    |
| Male                                          | 30                    | 30                    | 0.077              |
| Female                                        | 10                    | 3                     |                    |
| <b>Age</b>                                    |                       |                       |                    |
| <60                                           | 6                     | 8                     | 0.318              |
| ≥60                                           | 34                    | 25                    |                    |
| <b>Tumor location</b>                         |                       |                       |                    |
| Upper third                                   | 5                     | 5                     | 0.870              |
| Middle third                                  | 11                    | 9                     |                    |
| Lower third                                   | 15                    | 14                    |                    |
| More than 2/3 stomach                         | 9                     | 5                     |                    |
| <b>Tumor size</b>                             |                       |                       |                    |
| <4cm                                          | 14                    | 7                     | 0.195              |
| ≥4cm                                          | 26                    | 26                    |                    |
| <b>pT stage</b>                               |                       |                       |                    |
| pT1                                           | 6                     | 3                     | 0.767 <sup>a</sup> |
| pT2                                           | 6                     | 3                     |                    |
| pT3                                           | 4                     | 3                     |                    |
| pT4a                                          | 20                    | 18                    |                    |
| pT4b                                          | 4                     | 6                     |                    |
| <b>pN stage</b>                               |                       |                       |                    |
| pN0                                           | 10                    | 10                    | 0.398              |
| pN1                                           | 8                     | 10                    |                    |
| pN2                                           | 8                     | 8                     |                    |
| pN3a                                          | 9                     | 4                     |                    |
| pN3b                                          | 5                     | 1                     |                    |
| <b>pTNM stage</b>                             |                       |                       |                    |
| I                                             | 8                     | 4                     | 0.467              |
| II                                            | 5                     | 7                     |                    |
| III                                           | 27                    | 22                    |                    |
| <b>Histopathological classification</b>       |                       |                       |                    |
| High-moderately differentiated adenocarcinoma | 24                    | 16                    | 0.325              |
| Low-undifferentiated adenocarcinoma           | 16                    | 17                    |                    |
| <b>Borrman type</b>                           |                       |                       |                    |
| I                                             | 2                     | 1                     | 0.554 <sup>a</sup> |
| II                                            | 9                     | 4                     |                    |
| III                                           | 10                    | 7                     |                    |

IV

19

21

---

Note: <sup>a</sup>, fisher exact test; <sup>\*</sup>, P<0.05;
