# Supplementary material for: CD40×HER2 bispecific antibody overcomes the CCL2-induced trastuzumab resistance in HER2-positive gastric cancer
Source: HighWire-hosted journal article supplement (doi:10.1136/jitc-2022-005063), 2022-07-01
Supplement: jitc-2022-005063supp010_data_supplement.pdf [file jitc-2022-005063supp010_data_supplement.pdf]

**Supplementary Table 2.** Real-time PCR primers used in this study

| Gene                  | Primer type | Sequence (5' to 3')       |
|-----------------------|-------------|---------------------------|
| CCL2 (human)          | Forwr       | CAGCCAGATGCAATCAATGCC     |
| CCL2 (human)          | Reverse     | TGGAATCCTGAACCCACTTCT     |
| CD68 (human)          | Forwr       | CTTCTCTCATTCCCCTATGGACA   |
| CD68 (human)          | Reverse     | GAAGGACACATTGTACTCCACC    |
| CD14 (human)          | Forwr       | GACCTAAAGATAACCGGCACC     |
| CD14 (human)          | Reverse     | GCAATGCTCAGTACCTTGAGG     |
| CD36 (human)          | Forwr       | CTTTGGCTTAATGAGACTGGGAC   |
| CD36 (human)          | Reverse     | GCAACAAACATCACCACACCA     |
| CD86 (human)          | Forwr       | CCATCAGCTTGTCTGTTTCATTCC  |
| CD86 (human)          | Reverse     | GCTGTAATCCAAGGAATGTGGTC   |
| iNOS (human)          | Forwr       | TTCAGTATCACAACCTCAGCAAG   |
| iNOS (human)          | Reverse     | TGGACCTGCAAGTAAAATCCC     |
| TNF- $\alpha$ (human) | Forwr       | GAGGCCAAGCCCTGGTATG       |
| TNF- $\alpha$ (human) | Reverse     | CGGGCCGATTGATCTCAGC       |
| ARG1 (human)          | Forwr       | TGGACAGACTAGGAATTGGCA     |
| ARG1 (human)          | Reverse     | CCAGTCCGTCAACATCAAACT     |
| CD204 (human)         | Forwr       | GGTTTCAATTGTAAAGAGAGAGAAG |
| CD204 (human)         | Reverse     | CTGAGCAATTCTTCGTTTCCC     |
| CD206 (human)         | Forwr       | GGGTTGCTATCACTCTCTATGC    |
| CD206 (human)         | Reverse     | TTTCTTGTCTGTTGCCGTAGTT    |
| ZC3H12A (human)       | Forwr       | TTCTGCGTAAGAAGCCACTC      |
| ZC3H12A (human)       | Reverse     | GAATCGGCACTTGATCCCATAG    |
| ZC3H12B (human)       | Forwr       | GCCAGCTCTGTTCGATCACC      |
| ZC3H12B (human)       | Reverse     | GCTTTAGCGCAAACCTCCATCTT   |
| ZC3H12C (human)       | Forwr       | CAGCAAAGTGGAGTCAAGTACA    |
| ZC3H12C (human)       | Reverse     | GCTGGACTTAACTGTGGGTCA     |
| ZC3H12D (human)       | Forwr       | AGTTCTCTGCGACCCATAGTG     |
| ZC3H12D (human)       | Reverse     | AACAGCCAGCTTGATTCCCC      |
| GAPDH (human)         | Forwr       | CTCCTCCACCTTTGACGCTG      |
| GAPDH (human)         | Reverse     | TCCTCTTGTGCTCTTGCTGG      |
| ZC3H12A (mouse)       | Forwr       | ACGAAGCCTGTCCAAGAATCC     |
| ZC3H12A (mouse)       | Reverse     | TAGGGGCCTCTTTAGCCACA      |
| ZC3H12B (mouse)       | Forwr       | CCCAGAGCAGCATTTTACAGG     |
| ZC3H12B (mouse)       | Reverse     | TCTGCATAACCCAACTTTAGAGC   |
| ZC3H12C (mouse)       | Forwr       | CTCTGAGGGAAGCACGAGTTC     |
| ZC3H12C (mouse)       | Reverse     | GAGCGACATAGCTGTCTGTGA     |
| ZC3H12D (mouse)       | Forwr       | ACATCAAGGTTTTTGTCCCATCT   |
| ZC3H12D (mouse)       | Reverse     | GGTCATCGTAGCAGACCACTC     |
| GAPDH (mouse)         | Forwr       | CTCCTCCACCTTTGACGCTG      |
| GAPDH (mouse)         | Reverse     | TCCTCTTGTGCTCTTGCTGG      |
