# Supplementary material for: CD40×HER2 bispecific antibody overcomes the CCL2-induced trastuzumab resistance in HER2-positive gastric cancer
Source: PubMed Central journal article supplement (PMC9295658; doi:10.1136/jitc-2022-005063), 2022-07-15
Supplement: jitc-2022-005063supp011.pdf [file jitc-2022-005063supp011.pdf]

**Supplementary Table 3.** Main antibodies adopted in study

| Name                                        | Company     | Cat. No.   | Application                            |
|---------------------------------------------|-------------|------------|----------------------------------------|
| Anti-CCL2                                   | R&D         | MAB679     | WB (Hu,1:1000),<br>IHC (Hu, Mo, 1:200) |
| Anti-ZC3H12A                                | Proteintech | 25009-1-AP | WB (Hu,1:2000)                         |
| Anti-CD40                                   | R&D         | AF632      | In vitro agonist activity              |
| Anti-CD40                                   | Bio X Cell  | BE0016-2   | In vivo agonist activity               |
| Anti- iNOS                                  | Santa Cruz  | sc-7271    | WB (Hu, 1:200)                         |
| Anti-Arg1                                   | CST         | #93668     | WB (Hu, 1:1000)                        |
| Anti-p-p65 (Ser536)                         | CST         | #3033      | WB (Hu, 1:1000)                        |
| Anti-total-p65                              | CST         | #8242      | WB (Hu, 1:1000)                        |
| Anti-p-IKK $\beta$<br>(Ser176/180)          | CST         | #2694      | WB (Hu, 1:1000)                        |
| Anti- total-IKK $\beta$                     | Abcam       | ab124957   | WB (Hu, 1:1000)                        |
| Anti- p-I $\kappa$ B $\alpha$<br>(Ser32/36) | CST         | #9246      | WB (Hu, 1:1000)                        |
| Anti-total-I $\kappa$ B $\alpha$            | CST         | #9242      | WB (Hu, 1:1000)                        |
| Anti-Flag/<br>DYKDDDDK-tag                  | Abmart      | M20008     | WB (Hu, 1:5000)                        |
| Anti-Myc-tag                                | Abmart      | M20002     | WB (Hu, 1:5000)                        |
| Anti-His-tag                                | Abmart      | M20001     | WB (Hu, 1:5000)                        |
| Anti-Flag-tag (HRP<br>Conjugated)           | Abmart      | M20026     | WB (Hu, 1:5000)                        |
| Anti-Myc-tag (HRP<br>Conjugated)            | Abmart      | M20019     | WB (Hu, 1:1000)                        |
| Anti-His-tag (HRP<br>Conjugated)            | Abmart      | M20020     | WB (Hu, 1:5000)                        |
| Anti-HA (HRP<br>Conjugated)                 | Abmart      | M20021     | WB (Hu, 1:5000)                        |
| Anti- $\beta$ -actin                        | Proteintech | 66009-1-Ig | WB (Hu, 1:1000)                        |
| Anti-F4/80                                  | novus       | NB600-404  | IHC (Mo, 1:500)                        |
| Anti-CD68                                   | Abacam      | ab955      | IHC (Hu, 1:1000)<br>IF (Hu,1:500)      |
| Anti-CD86                                   | novus       | NBP2-25208 | IHC (Mo,1:500)                         |
| Anti-CD86                                   | Santa Cruz  | sc-28347   | IHC (Hu, 1:200)                        |
| Anti-CD206                                  | Abacam      | ab64693    | IHC (Hu, Mo, 1:500)<br>IF (Hu, 1:100)  |
| Caspase 3                                   | CST         | #9662      | IHC (Mo, 1:1000)                       |
| TruStain Fc X                               | Biolegend   | 422302     | Flow cytometry (Hu)                    |
| FITC anti-CD68                              | eBioscience | 11-0689-42 | Flow cytometry (Hu)                    |
| PE anti-CD86                                | eBioscience | 12-0862-81 | Flow cytometry (Hu)                    |
| APC anti-CD206                              | Biolegend   | 321110     | Flow cytometry (Hu)                    |
| Anti-CD16/CD32                              | eBioscience | 14-0161-82 | Flow cytometry (Mo)                    |

---

|                  |             |            |                     |
|------------------|-------------|------------|---------------------|
| PE/Cy7 anti-CD45 | Biolegend   | 103114     | Flow cytometry (Mo) |
| APC anti-CD11b   | eBioscience | 17-0112-81 | Flow cytometry (Mo) |
| FITC anti-F4/80  | eBioscience | 11-4801-82 | Flow cytometry (Mo) |
| PE anti-CD206    | eBioscience | 12-2061-80 | Flow cytometry (Mo) |

---
